# Supplementary material
Source: PubMed Central journal article supplement (PMC7597555)
Supplement: NIHMS1636441-supplement-Supplementary_Material.pdf [file NIHMS1636441-supplement-Supplementary_Material.pdf]

## Supplementary appendix

This appendix formed part of the original submission and has been peer reviewed. We post it as supplied by the authors.

Supplement to: Richardson RA, Keyes KM, Medina JT, Calvo E. Sociodemographic inequalities in depression among older adults: cross-sectional evidence from 18 countries. *Lancet Psychiatry* 2020; 7: 673–81.

# Appendix

## Table of Contents

|                                                                                                                                                  |      |
|--------------------------------------------------------------------------------------------------------------------------------------------------|------|
| Description of surveys.....                                                                                                                      | 2–4  |
| Number of people who screened positive for depression by socio-demographic factors and country.....                                              | 5    |
| Socio-demographic inequalities in depression expressed as prevalence differences.....                                                            | 6–7  |
| Unstandardized, partially standardized, and fully standardized prevalence ratios by gender, age, educational attainment, and marital status..... | 8–11 |

## Description of surveys

We used secondary publicly available data from 8 longitudinal surveys for 93,590 older adults encompassing 18 countries. Among these surveys, the oldest and most established is the Health and Retirement Survey (HRS). The HRS has resulted in more than 4,000 papers,<sup>1</sup> including high impact landmark papers on the links between wealth and health,<sup>2</sup> and describing retirement trends and its relation to pensions and Social Security benefits.<sup>3,4</sup> The HRS became a model for the development of sister aging cohort studies, including the Survey of Health, the Ageing and Retirement in Europe (SHARE), the English Longitudinal Study of Ageing (ELSA), the Japanese Study of Aging and Retirement (JSTAR), the China Health and Retirement Survey (CHARLS), and the Korean Longitudinal Study of Aging (KLoSA). These surveys have led to major contributions to the literature, and – due to the comparability of measures used in these surveys across countries – have allowed cross-national comparison of the health and well-being of older adults, including comparisons of cognitive functioning,<sup>5</sup> physical functioning,<sup>6</sup> and life-disability.<sup>7</sup>

Basic information about each survey is summarized in the table below, and additional details about survey methodology is available elsewhere.<sup>1,8-13</sup> We selected these surveys for inclusion in our study because they focused on issues related to health and aging and included comparable information for a large sample of individuals age 50 and older, including comparable tools to assess depressive symptoms.

Each survey calculated response rates slightly differently, and therefore response rates are not directly comparable across countries. Therefore, we do not report response rates in the table below, although response rates in each country for the selected survey year were generally high, ranging from 75.4% (Korea)<sup>14</sup> to 93% (Italy).<sup>15</sup>

Survey characteristics

| <u>Country</u> | <u>Survey name, year</u>                                                     | <u>Eligibility criteria &amp; sample characteristics</u>                                           | <u>Depression measure</u> |
|----------------|------------------------------------------------------------------------------|----------------------------------------------------------------------------------------------------|---------------------------|
| Austria        | Survey of Health, Aging, and Retirement in Europe (SHARE), <sup>8</sup> 2013 | Nationally representative sample of adults aged 50 or older and their spouses (regardless of age). | EURO-D                    |
| Belgium        | Survey of Health, Aging, and Retirement in Europe (SHARE), <sup>8</sup> 2013 | Nationally representative sample of adults aged 50 or older and their spouses (regardless of age). | EURO-D                    |
| China          | China Health and Retirement Longitudinal Study (CHARLS), <sup>9</sup> 2013   | Nationally representative sample of adults 45 or older and their spouses (regardless of age)       | CES-D, 10 item            |
| Chile          | Encuesta de Previsión Social (EPS), <sup>10</sup> 2009                       | Nationally representative sample of adults aged 18 and older.                                      | CES-D, 8 item             |
| Denmark        | Survey of Health, Aging, and Retirement in Europe (SHARE), <sup>8</sup> 2013 | Nationally representative sample of adults aged 50 or older and their spouses (regardless of age). | EURO-D                    |
| England        | English Longitudinal Study of Aging (ELSA), <sup>11</sup> 2014/2015          | Nationally representative sample of adults aged 50 or older and their spouses (regardless of age). | CES-D, 8 item             |
| France         | Survey of Health, Aging, and Retirement in Europe (SHARE), <sup>8</sup> 2013 | Nationally representative sample of adults aged 50 or older and their spouses (regardless of age). | EURO-D                    |
| Germany        | Survey of Health, Aging, and Retirement in Europe (SHARE), <sup>8</sup> 2013 | Nationally representative sample of adults aged 50 or older and their spouses (regardless of age). | EURO-D                    |
| Greece         | Survey of Health, Aging, and Retirement in Europe (SHARE), <sup>8</sup> 2007 | Nationally representative sample of adults aged 50 or older and their spouses (regardless of age). | EURO-D                    |
| Israel         | Survey of Health, Aging, and Retirement in Europe (SHARE), <sup>8</sup> 2013 | Nationally representative sample of adults aged 50 or older and their spouses (regardless of age). | EURO-D                    |

| <u>Country</u>  | <u>Survey name, year</u>                                                     | <u>Eligibility criteria &amp; sample characteristics</u>                                                                                             | <u>Depression measure</u> |
|-----------------|------------------------------------------------------------------------------|------------------------------------------------------------------------------------------------------------------------------------------------------|---------------------------|
| Italy           | Survey of Health, Aging, and Retirement in Europe (SHARE), <sup>8</sup> 2013 | Nationally representative sample of adults aged 50 or older and their spouses (regardless of age).                                                   | EURO-D                    |
| Japan           | Japanese Study of Aging and Retirement (JSTAR), <sup>12</sup> 2011           | Adults aged 50 and older residing in 10 municipalities in eastern Japan.                                                                             | CES-D, 8 item             |
| Korea           | Korean Longitudinal Study of Aging (KLoSA), <sup>13</sup> 2012               | Nationally representative sample of adults 45 or older. Island dwelling individuals excluded.                                                        | CES-D, 10 item            |
| The Netherlands | Survey of Health, Aging, and Retirement in Europe (SHARE), <sup>8</sup> 2013 | Nationally representative sample of adults aged 50 or older and their spouses (regardless of age).                                                   | EURO-D                    |
| Spain           | Survey of Health, Aging, and Retirement in Europe (SHARE), <sup>8</sup> 2013 | Nationally representative sample of adults aged 50 or older and their spouses (regardless of age).                                                   | EURO-D                    |
| Sweden          | Survey of Health, Aging, and Retirement in Europe (SHARE), <sup>8</sup> 2013 | Nationally representative sample of adults aged 50 or older and their spouses (regardless of age).                                                   | EURO-D                    |
| Switzerland     | Survey of Health, Aging, and Retirement in Europe (SHARE), <sup>8</sup> 2013 | Nationally representative sample of adults aged 50 or older and their spouses (regardless of age).                                                   | EURO-D                    |
| US              | Health and Retirement Survey (HRS), <sup>1</sup> 2014                        | Adults living in the contiguous U.S. aged 55 or older and their spouses (regardless of age). African-American and Hispanic populations over-sampled. | CES-D, 8 item             |

CES-D = Center for Epidemiological Depression scale

## Number of people who screened positive for depression by socio-demographic factors and country

(Number who screened positive for depression/total in category)

|                 | Age               |                 |                    | Marital Status                |                                |                 |                                 | Gender            |                   | Educational attainment           |                                  |                         |
|-----------------|-------------------|-----------------|--------------------|-------------------------------|--------------------------------|-----------------|---------------------------------|-------------------|-------------------|----------------------------------|----------------------------------|-------------------------|
|                 | <u>55-65</u>      | <u>65-75</u>    | <u>75 or older</u> | <u>Married/<br/>partnered</u> | <u>Divorced/<br/>separated</u> | <u>Widowed</u>  | <u>Single never<br/>married</u> | <u>Female</u>     | <u>Male</u>       | <u>Less than<br/>high school</u> | <u>High school<br/>completed</u> | <u>Some<br/>college</u> |
| Austria         | 213/1387          | 279/1449        | 234/845            | 393/2364                      | 92/422                         | 188/629         | 44/230                          | 516/2124          | 210/1557          | 269/906                          | 287/1680                         | 170/1095                |
| Belgium         | 522/1930          | 373/1400        | 404/1197           | 814/3188                      | 165/443                        | 267/671         | 47/194                          | 864/2460          | 435/2067          | 630/1914                         | 305/1144                         | 364/1469                |
| Chile           | 1430/2237         | 891/1429        | 550/843            | 1626/2744                     | 244/358                        | 645/857         | 353/542                         | 1642/2268         | 1229/2241         | 2384/3575                        | 293/516                          | 194/418                 |
| China           | 2567/5968         | 1313/3163       | 461/1200           | 3531/8708                     | 53/93                          | 721/1451        | 38/82                           | 2514/5127         | 1829/5207         | 4035/9312                        | 189/562                          | 117/456                 |
| Denmark         | 256/1440          | 162/1166        | 150/722            | 393/2537                      | 50/261                         | 95/390          | 29/121                          | 367/1754          | 201/1575          | 138/674                          | 221/1311                         | 209/1344                |
| England         | 529/2850          | 479/2955        | 553/2242           | 795/5588                      | 251/828                        | 417/1248        | 98/381                          | 1023/4451         | 538/3596          | 602/2293                         | 250/1372                         | 357/2682                |
| France          | 489/1600          | 376/1218        | 498/1119           | 802/2614                      | 137/343                        | 327/703         | 80/217                          | 938/2229          | 425/1708          | 749/1786                         | 420/1342                         | 194/809                 |
| Germany         | 455/1965          | 328/1506        | 263/964            | 767/3500                      | 75/279                         | 161/481         | 38/145                          | 670/2266          | 376/2169          | 214/618                          | 592/2370                         | 240/1447                |
| Greece          | 138/1138          | 156/827         | 187/566            | 252/1754                      | 24/115                         | 183/540         | 20/115                          | 345/1335          | 136/1196          | 395/1675                         | 54/475                           | 32/381                  |
| Israel          | 134/844           | 149/655         | 221/516            | 333/1540                      | 38/119                         | 103/234         | 10/28                           | 320/1112          | 184/903           | 204/634                          | 108/516                          | 192/865                 |
| Italy           | 426/1469          | 526/1536        | 494/994            | 1030/3138                     | 35/97                          | 300/533         | 70/196                          | 980/2141          | 467/1859          | 1165/2912                        | 187/675                          | 95/413                  |
| Japan           | 605/1670          | 634/1866        | 122/376            | 975/3019                      | 95/226                         | 176/419         | 73/161                          | 764/2001          | 597/1911          | 333/1010                         | 650/1753                         | 370/1128                |
| Korea           | 813/2325          | 1065/2246       | 1166/1833          | 2035/4750                     | 82/145                         | 910/1474        | 17/35                           | 1851/3632         | 1193/2772         | 2266/4351                        | 561/1467                         | 217/585                 |
| The Netherlands | 267/1456          | 210/1310        | 143/779            | 423/2757                      | 63/229                         | 98/400          | 26/99                           | 405/1913          | 216/1636          | 358/1716                         | 137/854                          | 126/979                 |
| Spain           | 476/1978          | 449/1697        | 763/1823           | 1159/4277                     | 55/149                         | 374/710         | 61/239                          | 1144/2906         | 544/2595          | 1501/4488                        | 83/422                           | 104/591                 |
| Sweden          | 238/1326          | 258/1741        | 263/1056           | 511/3146                      | 86/338                         | 110/385         | 40/188                          | 518/2183          | 241/1941          | 339/1579                         | 178/962                          | 242/1583                |
| Switzerland     | 167/1067          | 140/932         | 157/651            | 310/1981                      | 58/232                         | 64/283          | 25/120                          | 316/1417          | 148/1233          | 130/564                          | 224/1220                         | 110/866                 |
| US              | <u>1629/6558</u>  | <u>809/4513</u> | <u>1115/5034</u>   | <u>1693/9751</u>              | <u>720/2399</u>                | <u>894/3115</u> | <u>245/838</u>                  | <u>2349/9398</u>  | <u>1203/6703</u>  | <u>1262/3652</u>                 | <u>1604/7719</u>                 | <u>687/4730</u>         |
| <b>Overall</b>  | 11,354/<br>39,208 | 8597/<br>31,609 | 7744/<br>22,760    | 17,842/<br>67,356             | 2323/<br>7076                  | 6033/<br>14,523 | 1314/<br>3931                   | 17,526/<br>50,717 | 10,172/<br>42,869 | 16,974/<br>43,659                | 6343/<br>26,360                  | 4020/<br>21,841         |

<sup>1</sup>Depression 'caseness' determined with the EURO-D

<sup>2</sup>Depression 'caseness' determined with the Center for Epidemiological Depression scale (CES-D), 8 item

<sup>3</sup>Depression 'caseness' determined with the Center for Epidemiological Depression scale (CES-D), 10 item

# Socio-demographic inequalities in depression expressed as prevalence differences

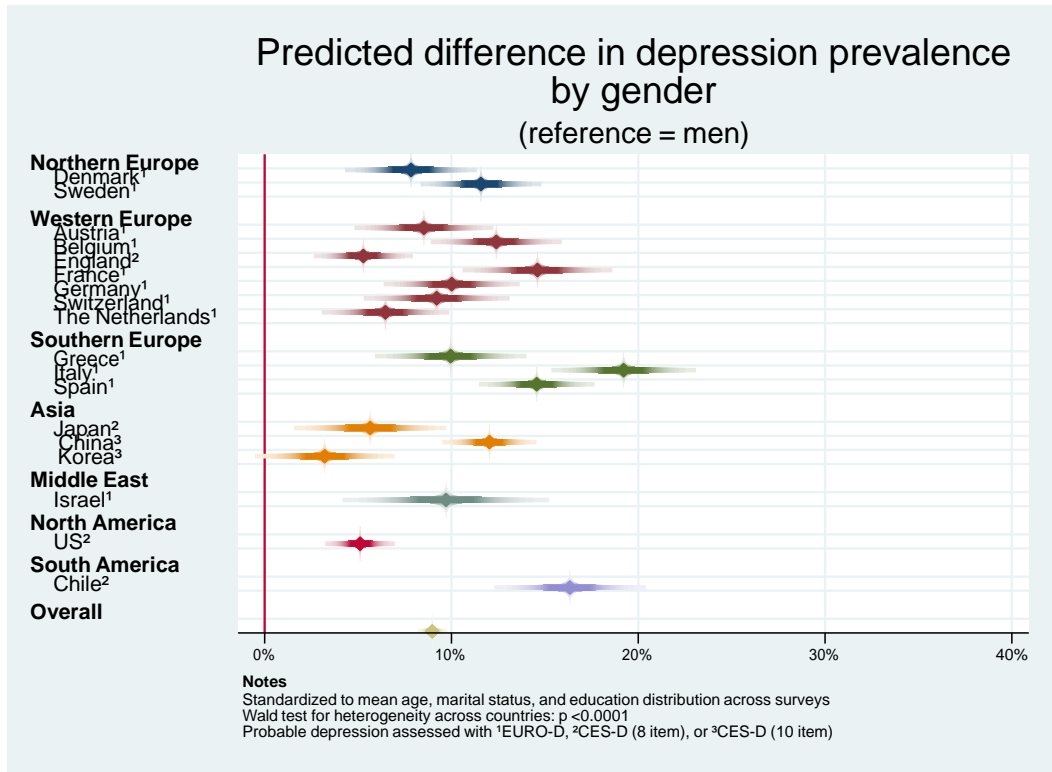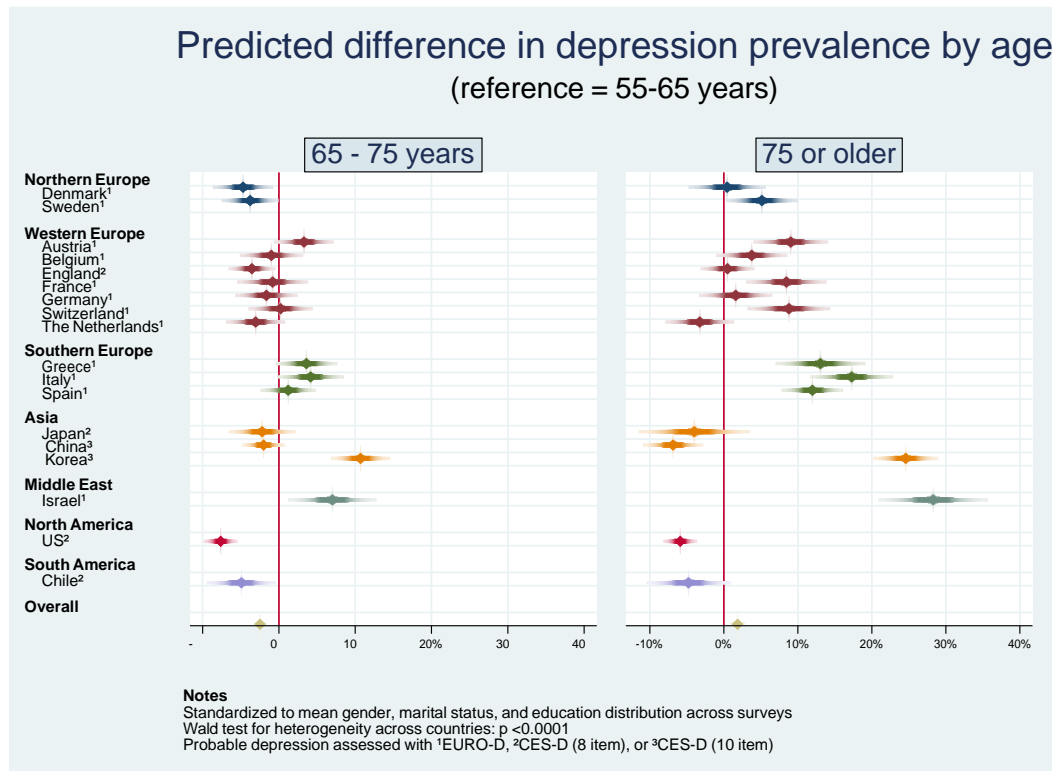

## Predicted difference in depression prevalence by educational attainment (reference = at least some college)

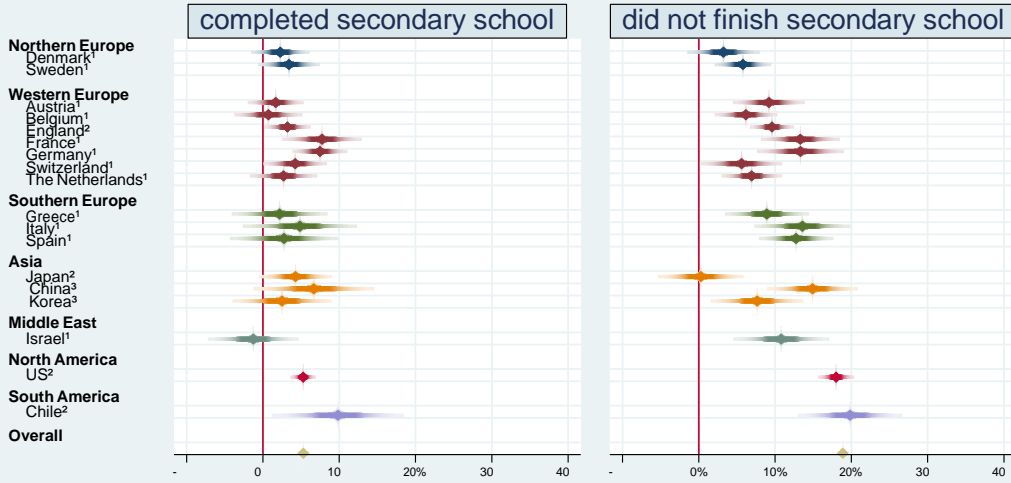

**Notes**  
Standardized to mean gender, marital status, and age distribution across surveys  
Wald test for heterogeneity across countries:  $p < 0.0001$   
Probable depression assessed with <sup>1</sup>EURO-D, <sup>2</sup>CES-D (8 item), or <sup>3</sup>CES-D (10 item)

## Predicted difference in depression prevalence by marital status (reference = married/partnered)

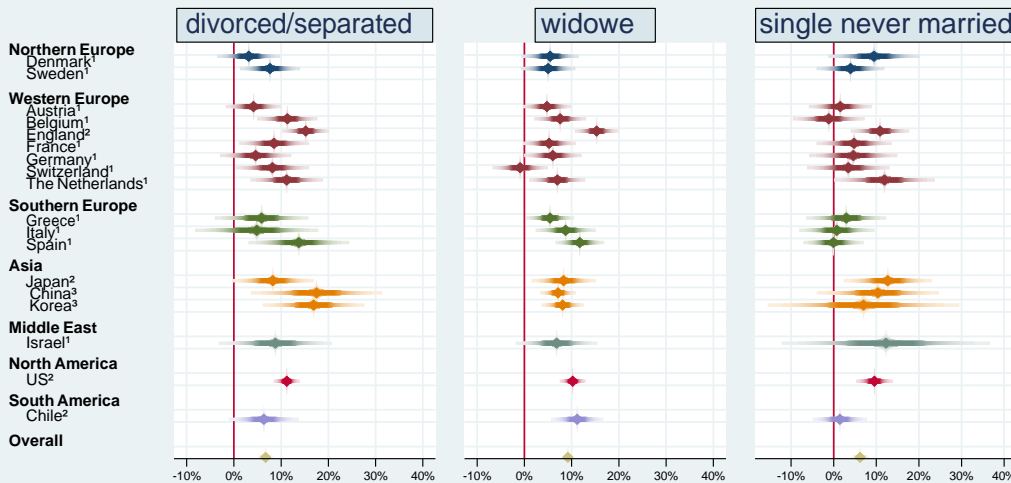

**Notes**  
Standardized to mean gender, age, and education distribution across surveys  
Wald test for heterogeneity across countries:  $p < 0.0001$   
Probable depression assessed with <sup>1</sup>EURO-D, <sup>2</sup>CES-D (8 item), or <sup>3</sup>CES-D (10 item)



## Unstandardized, partially standardized, and fully standardized prevalence ratios by gender, age, educational attainment, and marital status

### Depression prevalence ratio (95% CI) by gender

(reference = men)

|                 | <u>Unstandardized</u>    | <u>Partially standardized*</u> | <u>Fully standardized**</u> |
|-----------------|--------------------------|--------------------------------|-----------------------------|
| Austria         | 1.53 (1.30, 1.77)        | 1.54 (1.30, 1.78)              | 1.56 (1.31, 1.80)           |
| Belgium         | 1.56 (1.40, 1.72)        | 1.56 (1.40, 1.72)              | 1.57 (1.41, 1.73)           |
| Chile           | 1.31 (1.24, 1.38)        | 1.31 (1.24, 1.38)              | 1.32 (1.25, 1.40)           |
| China           | 1.37 (1.30, 1.43)        | 1.37 (1.30, 1.43)              | 1.38 (1.31, 1.45)           |
| Denmark         | 1.57 (1.31, 1.82)        | 1.57 (1.32, 1.82)              | 1.58 (1.32, 1.83)           |
| England         | 1.32 (1.17, 1.46)        | 1.32 (1.17, 1.46)              | 1.34 (1.19, 1.49)           |
| France          | 1.56 (1.41, 1.71)        | 1.57 (1.41, 1.72)              | 1.58 (1.42, 1.74)           |
| Germany         | 1.47 (1.30, 1.63)        | 1.47 (1.30, 1.63)              | 1.48 (1.31, 1.65)           |
| Greece          | 1.88 (1.51, 2.25)        | 1.93 (1.53, 2.32)              | 1.96 (1.55, 2.36)           |
| Israel          | 1.41 (1.19, 1.64)        | 1.47 (1.21, 1.72)              | 1.49 (1.22, 1.75)           |
| Italy           | 1.78 (1.61, 1.95)        | 1.82 (1.64, 2.01)              | 1.85 (1.66, 2.04)           |
| Japan           | 1.18 (1.07, 1.29)        | 1.18 (1.07, 1.29)              | 1.18 (1.07, 1.29)           |
| Korea           | 1.07 (1.01, 1.13)        | 1.07 (1.01, 1.14)              | 1.07 (1.01, 1.14)           |
| The Netherlands | 1.45 (1.23, 1.67)        | 1.45 (1.23, 1.67)              | 1.46 (1.23, 1.69)           |
| Spain           | 1.74 (1.58, 1.90)        | 1.76 (1.60, 1.93)              | 1.81 (1.63, 1.99)           |
| Sweden          | 1.87 (1.60, 2.13)        | 1.88 (1.61, 2.15)              | 1.90 (1.62, 2.17)           |
| Switzerland     | 1.72 (1.39, 2.04)        | 1.73 (1.40, 2.06)              | 1.74 (1.41, 2.07)           |
| US              | <u>1.24 (1.16, 1.31)</u> | <u>1.24 (1.16, 1.32)</u>       | <u>1.26 (1.18, 1.34)</u>    |
| <b>Overall</b>  | 1.38 (1.35, 1.40)        | 1.38 (1.36, 1.41)              | 1.40 (1.37, 1.43)           |

\*Standardized to the mean age distribution across surveys

\*\*Standardized to the mean age, marital status, and education distribution across surveys

**Depression prevalence ratio (95% CI) by age**

(reference = 55 - 65)

|                 | <u>Unstandardized</u> |                    | <u>Partially standardized*</u> |                    | <u>Fully standardized**</u> |                    |
|-----------------|-----------------------|--------------------|--------------------------------|--------------------|-----------------------------|--------------------|
|                 | <u>65-75</u>          | <u>75 or older</u> | <u>65-75</u>                   | <u>75 or older</u> | <u>65-75</u>                | <u>75 or older</u> |
| Austria         | 1.19 (1.00, 1.38)     | 1.52 (1.25, 1.79)  | 1.20 (1.00, 1.39)              | 1.53 (1.26, 1.81)  | 1.20 (1.00, 1.40)           | 1.55 (1.27, 1.83)  |
| Belgium         | 0.97 (0.86, 1.07)     | 1.13 (1.00, 1.26)  | 0.96 (0.85, 1.08)              | 1.14 (1.00, 1.27)  | 0.96 (0.85, 1.08)           | 1.14 (1.00, 1.28)  |
| Chile           | 0.93 (0.87, 0.98)     | 0.93 (0.86, 0.99)  | 0.92 (0.87, 0.98)              | 0.93 (0.86, 0.99)  | 0.92 (0.87, 0.98)           | 0.92 (0.85, 0.99)  |
| China           | 0.95 (0.90, 1.00)     | 0.84 (0.77, 0.91)  | 0.95 (0.90, 1.00)              | 0.84 (0.76, 0.91)  | 0.95 (0.90, 1.00)           | 0.83 (0.76, 0.90)  |
| Denmark         | 0.76 (0.62, 0.89)     | 1.02 (0.82, 1.23)  | 0.76 (0.62, 0.89)              | 1.02 (0.82, 1.23)  | 0.75 (0.62, 0.89)           | 1.02 (0.81, 1.23)  |
| England         | 0.83 (0.73, 0.93)     | 1.02 (0.89, 1.16)  | 0.83 (0.72, 0.93)              | 1.02 (0.89, 1.16)  | 0.82 (0.71, 0.93)           | 1.02 (0.88, 1.17)  |
| France          | 0.97 (0.87, 1.08)     | 1.26 (1.12, 1.39)  | 0.97 (0.86, 1.09)              | 1.27 (1.12, 1.41)  | 0.97 (0.86, 1.09)           | 1.27 (1.12, 1.42)  |
| Germany         | 0.94 (0.83, 1.05)     | 1.06 (0.92, 1.20)  | 0.94 (0.83, 1.05)              | 1.06 (0.92, 1.20)  | 0.94 (0.82, 1.05)           | 1.07 (0.91, 1.21)  |
| Greece          | 1.30 (1.01, 1.58)     | 2.05 (1.59, 2.51)  | 1.31 (1.01, 1.61)              | 2.11 (1.61, 2.60)  | 1.32 (1.01, 1.62)           | 2.15 (1.64, 2.66)  |
| Israel          | 1.39 (1.10, 1.68)     | 2.52 (2.04, 3.01)  | 1.40 (1.10, 1.69)              | 2.58 (2.07, 3.09)  | 1.41 (1.11, 1.72)           | 2.66 (2.13, 3.20)  |
| Italy           | 1.14 (1.02, 1.26)     | 1.57 (1.40, 1.74)  | 1.15 (1.02, 1.28)              | 1.62 (1.43, 1.81)  | 1.15 (1.02, 1.29)           | 1.64 (1.45, 1.84)  |
| Japan           | 0.94 (0.85, 1.03)     | 0.89 (0.74, 1.04)  | 0.94 (0.85, 1.03)              | 0.89 (0.73, 1.04)  | 0.94 (0.85, 1.03)           | 0.89 (0.73, 1.05)  |
| Korea           | 1.29 (1.20, 1.38)     | 1.67 (1.55, 1.79)  | 1.29 (1.20, 1.39)              | 1.67 (1.55, 1.79)  | 1.30 (1.20, 1.40)           | 1.69 (1.57, 1.81)  |
| The Netherlands | 0.85 (0.71, 0.98)     | 0.84 (0.67, 1.00)  | 0.84 (0.70, 0.98)              | 0.83 (0.66, 1.00)  | 0.84 (0.70, 0.98)           | 0.83 (0.66, 1.00)  |
| Spain           | 1.05 (0.93, 1.17)     | 1.48 (1.33, 1.63)  | 1.05 (0.93, 1.17)              | 1.51 (1.35, 1.67)  | 1.05 (0.93, 1.18)           | 1.54 (1.37, 1.71)  |
| Sweden          | 0.81 (0.68, 0.93)     | 1.26 (1.05, 1.47)  | 0.80 (0.67, 0.93)              | 1.27 (1.05, 1.49)  | 0.80 (0.67, 0.93)           | 1.27 (1.05, 1.50)  |
| Switzerland     | 1.01 (0.80, 1.22)     | 1.56 (1.23, 1.89)  | 1.01 (0.80, 1.23)              | 1.58 (1.23, 1.92)  | 1.01 (0.80, 1.23)           | 1.59 (1.24, 1.93)  |
| US              | 0.73 (0.70, 0.78)     | 0.79 (0.74, 0.85)  | 0.73 (0.68, 0.78)              | 0.79 (0.74, 0.85)  | 0.71 (0.66, 0.77)           | 0.78 (0.72, 0.84)  |
| <b>Overall</b>  | 0.96 (0.93, 0.98)     | 1.11 (1.08, 1.14)  | 0.96 (0.93, 0.98)              | 1.12 (1.09, 1.15)  | 0.95 (0.93, 0.97)           | 1.12 (1.09, 1.15)  |

\*Standardized to the mean gender distribution across surveys

\*\*Standardized to the mean gender, education, and marital status distribution across surveys

**Depression prevalence ratio (95% CI) by educational attainment**

(reference = at least some college)

|                 | <u>Unstandardized</u>   |                                   | <u>Partially standardized*</u> |                                   | <u>Fully standardized**</u> |                                   |
|-----------------|-------------------------|-----------------------------------|--------------------------------|-----------------------------------|-----------------------------|-----------------------------------|
|                 | <u>Secondary school</u> | <u>Less than secondary school</u> | <u>Secondary school</u>        | <u>Less than secondary school</u> | <u>Secondary school</u>     | <u>Less than secondary school</u> |
| Austria         | 1.11 (0.92, 1.30)       | 1.58 (1.30, 1.87)                 | 1.11 (0.91, 1.31)              | 1.61 (1.31, 1.90)                 | 1.11 (0.91, 1.31)           | 1.61 (1.31, 1.91)                 |
| Belgium         | 1.03 (0.89, 1.16)       | 1.24 (1.10, 1.37)                 | 1.03 (0.89, 1.17)              | 1.25 (1.10, 1.39)                 | 1.03 (0.89, 1.17)           | 1.25 (1.10, 1.39)                 |
| Chile           | 1.20 (1.05, 1.35)       | 1.40 (1.26, 1.55)                 | 1.21 (1.05, 1.36)              | 1.42 (1.27, 1.57)                 | 1.21 (1.05, 1.36)           | 1.42 (1.27, 1.57)                 |
| China           | 1.22 (1.00, 1.44)       | 1.49 (1.27, 1.71)                 | 1.22 (1.00, 1.45)              | 1.50 (1.28, 1.73)                 | 1.23 (1.00, 1.46)           | 1.51 (1.28, 1.74)                 |
| Denmark         | 1.14 (0.95, 1.34)       | 1.20 (0.96, 1.45)                 | 1.15 (0.95, 1.35)              | 1.21 (0.96, 1.46)                 | 1.15 (0.95, 1.35)           | 1.21 (0.96, 1.46)                 |
| England         | 1.23 (1.05, 1.41)       | 1.68 (1.47, 1.89)                 | 1.23 (1.05, 1.42)              | 1.69 (1.49, 1.90)                 | 1.24 (1.05, 1.43)           | 1.73 (1.51, 1.94)                 |
| France          | 1.30 (1.12, 1.49)       | 1.52 (1.31, 1.73)                 | 1.32 (1.12, 1.51)              | 1.55 (1.33, 1.77)                 | 1.32 (1.12, 1.52)           | 1.55 (1.33, 1.77)                 |
| Germany         | 1.41 (1.22, 1.60)       | 1.72 (1.43, 2.01)                 | 1.42 (1.23, 1.61)              | 1.75 (1.45, 2.04)                 | 1.42 (1.23, 1.61)           | 1.75 (1.45, 2.05)                 |
| Greece          | 1.19 (0.73, 1.65)       | 1.76 (1.17, 2.34)                 | 1.20 (0.71, 1.70)              | 1.83 (1.19, 2.47)                 | 1.20 (0.71, 1.70)           | 1.84 (1.19, 2.48)                 |
| Israel          | 0.95 (0.75, 1.14)       | 1.45 (1.21, 1.69)                 | 0.94 (0.73, 1.15)              | 1.52 (1.24, 1.80)                 | 0.94 (0.72, 1.15)           | 1.52 (1.24, 1.81)                 |
| Italy           | 1.18 (0.95, 1.41)       | 1.49 (1.24, 1.74)                 | 1.20 (0.94, 1.45)              | 1.55 (1.26, 1.83)                 | 1.20 (0.94, 1.46)           | 1.55 (1.26, 1.84)                 |
| Japan           | 1.13 (1.01, 1.25)       | 1.01 (0.88, 1.14)                 | 1.13 (1.01, 1.25)              | 1.01 (0.88, 1.14)                 | 1.13 (1.01, 1.25)           | 1.01 (0.88, 1.14)                 |
| Korea           | 1.06 (0.94, 1.18)       | 1.18 (1.05, 1.30)                 | 1.06 (0.94, 1.18)              | 1.18 (1.06, 1.31)                 | 1.06 (0.94, 1.19)           | 1.19 (1.06, 1.32)                 |
| The Netherlands | 1.20 (0.93, 1.46)       | 1.50 (1.21, 1.78)                 | 1.20 (0.93, 1.47)              | 1.51 (1.22, 1.80)                 | 1.20 (0.93, 1.48)           | 1.52 (1.22, 1.81)                 |
| Spain           | 1.13 (0.86, 1.41)       | 1.61 (1.33, 1.88)                 | 1.14 (0.84, 1.44)              | 1.66 (1.36, 1.97)                 | 1.15 (0.84, 1.45)           | 1.68 (1.37, 1.99)                 |
| Sweden          | 1.22 (1.01, 1.43)       | 1.37 (1.16, 1.57)                 | 1.23 (1.01, 1.46)              | 1.39 (1.16, 1.61)                 | 1.23 (1.01, 1.45)           | 1.39 (1.17, 1.61)                 |
| Switzerland     | 1.31 (1.03, 1.58)       | 1.41 (1.07, 1.75)                 | 1.32 (1.03, 1.60)              | 1.42 (1.07, 1.78)                 | 1.32 (1.03, 1.61)           | 1.42 (1.07, 1.78)                 |
| US              | 1.38 (1.27, 1.50)       | 2.29 (2.10, 2.48)                 | 1.39 (1.27, 1.50)              | 2.31 (2.12, 2.51)                 | 1.39 (1.28, 1.51)           | 2.34 (2.14, 2.55)                 |
| <b>Overall</b>  | 1.19 (1.14, 1.24)       | 1.50 (1.45, 1.56)                 | 1.20 (1.15, 1.25)              | 1.53 (1.47, 1.59)                 | 1.20 (1.15, 1.26)           | 1.53 (1.47, 1.59)                 |

\*Standardized to the mean gender and age distribution across surveys

\*\*Standardized to the mean gender, age, and marital status distribution across surveys

## Depression prevalence ratio (95% CI) by marital status

(reference = married/partnered )

|                 | <u>Unstandardized</u>          |                   |                                 | <u>Partially standardized*</u> |                   |                                 | <u>Fully standardized**</u>    |                   |                                 |
|-----------------|--------------------------------|-------------------|---------------------------------|--------------------------------|-------------------|---------------------------------|--------------------------------|-------------------|---------------------------------|
|                 | <u>Divorced/<br/>separated</u> | <u>Widowed</u>    | <u>Single never<br/>married</u> | <u>Divorced/<br/>separated</u> | <u>Widowed</u>    | <u>Single never<br/>married</u> | <u>Divorced/<br/>separated</u> | <u>Widowed</u>    | <u>Single never<br/>married</u> |
| Austria         | 1.21 (0.98, 1.45)              | 1.24 (1.03, 1.46) | 1.08 (0.79, 1.37)               | 1.22 (0.97, 1.47)              | 1.25 (1.04, 1.47) | 1.08 (0.78, 1.38)               | 1.22 (0.97, 1.48)              | 1.26 (1.04, 1.48) | 1.08 (0.78, 1.39)               |
| Belgium         | 1.42 (1.23, 1.60)              | 1.28 (1.12, 1.44) | 0.96 (0.72, 1.20)               | 1.43 (1.24, 1.63)              | 1.29 (1.12, 1.46) | 0.96 (0.71, 1.20)               | 1.43 (1.24, 1.63)              | 1.29 (1.12, 1.46) | 0.96 (0.71, 1.20)               |
| Chile           | 1.11 (1.01, 1.20)              | 1.19 (1.11, 1.26) | 1.02 (0.94, 1.11)               | 1.11 (1.01, 1.21)              | 1.19 (1.11, 1.27) | 1.02 (0.94, 1.11)               | 1.11 (1.01, 1.21)              | 1.19 (1.12, 1.27) | 1.03 (0.94, 1.11)               |
| China           | 1.47 (1.19, 1.76)              | 1.19 (1.11, 1.27) | 1.28 (0.99, 1.58)               | 1.48 (1.19, 1.78)              | 1.20 (1.11, 1.28) | 1.29 (0.99, 1.59)               | 1.50 (1.19, 1.80)              | 1.20 (1.12, 1.29) | 1.29 (0.98, 1.60)               |
| Denmark         | 1.19 (0.88, 1.50)              | 1.33 (1.03, 1.62) | 1.57 (1.07, 2.07)               | 1.19 (0.88, 1.51)              | 1.34 (1.04, 1.64) | 1.59 (1.07, 2.10)               | 1.19 (0.88, 1.51)              | 1.34 (1.04, 1.64) | 1.59 (1.07, 2.10)               |
| England         | 1.97 (1.70, 2.24)              | 1.97 (1.72, 2.23) | 1.70 (1.35, 2.04)               | 1.99 (1.71, 2.26)              | 1.99 (1.73, 2.25) | 1.71 (1.36, 2.06)               | 2.01 (1.73, 2.29)              | 2.01 (1.75, 2.28) | 1.72 (1.36, 2.08)               |
| France          | 1.26 (1.08, 1.43)              | 1.16 (1.02, 1.29) | 1.15 (0.94, 1.35)               | 1.27 (1.09, 1.45)              | 1.17 (1.02, 1.31) | 1.15 (0.94, 1.37)               | 1.27 (1.09, 1.46)              | 1.17 (1.03, 1.31) | 1.15 (0.94, 1.37)               |
| Germany         | 1.18 (0.95, 1.41)              | 1.23 (1.05, 1.42) | 1.18 (0.87, 1.49)               | 1.18 (0.95, 1.42)              | 1.24 (1.05, 1.43) | 1.18 (0.87, 1.50)               | 1.18 (0.95, 1.42)              | 1.24 (1.05, 1.43) | 1.18 (0.87, 1.50)               |
| Greece          | 1.38 (0.89, 1.88)              | 1.35 (1.08, 1.63) | 1.19 (0.72, 1.67)               | 1.41 (0.87, 1.96)              | 1.38 (1.09, 1.67) | 1.21 (0.70, 1.72)               | 1.42 (0.87, 1.98)              | 1.39 (1.09, 1.69) | 1.21 (0.69, 1.74)               |
| Israel          | 1.33 (0.98, 1.67)              | 1.26 (1.00, 1.51) | 1.46 (0.77, 2.14)               | 1.37 (0.98, 1.77)              | 1.29 (1.00, 1.58) | 1.52 (0.73, 2.31)               | 1.38 (0.97, 1.79)              | 1.30 (1.00, 1.60) | 1.54 (0.72, 2.36)               |
| Italy           | 1.14 (0.86, 1.43)              | 1.25 (1.11, 1.40) | 1.02 (0.82, 1.22)               | 1.15 (0.83, 1.48)              | 1.28 (1.12, 1.44) | 1.02 (0.81, 1.24)               | 1.16 (0.83, 1.49)              | 1.29 (1.12, 1.45) | 1.02 (0.80, 1.25)               |
| Japan           | 1.26 (1.05, 1.47)              | 1.26 (1.09, 1.43) | 1.40 (1.15, 1.65)               | 1.26 (1.05, 1.47)              | 1.26 (1.09, 1.43) | 1.40 (1.15, 1.65)               | 1.26 (1.05, 1.47)              | 1.26 (1.09, 1.43) | 1.40 (1.15, 1.66)               |
| Korea           | 1.38 (1.19, 1.56)              | 1.18 (1.10, 1.26) | 1.16 (0.77, 1.54)               | 1.40 (1.20, 1.59)              | 1.19 (1.11, 1.27) | 1.16 (0.76, 1.57)               | 1.40 (1.20, 1.59)              | 1.19 (1.11, 1.28) | 1.17 (0.76, 1.57)               |
| The Netherlands | 1.72 (1.33, 2.11)              | 1.45 (1.14, 1.75) | 1.76 (1.18, 2.35)               | 1.73 (1.33, 2.13)              | 1.46 (1.14, 1.77) | 1.78 (1.18, 2.38)               | 1.74 (1.33, 2.14)              | 1.46 (1.14, 1.78) | 1.79 (1.18, 2.40)               |
| Spain           | 1.55 (1.22, 1.87)              | 1.47 (1.30, 1.63) | 1.00 (0.78, 1.22)               | 1.59 (1.24, 1.94)              | 1.50 (1.33, 1.68) | 1.00 (0.77, 1.23)               | 1.61 (1.24, 1.97)              | 1.52 (1.34, 1.70) | 1.00 (0.76, 1.24)               |
| Sweden          | 1.42 (1.14, 1.70)              | 1.28 (1.03, 1.53) | 1.22 (0.88, 1.56)               | 1.44 (1.15, 1.74)              | 1.29 (1.03, 1.56) | 1.23 (0.88, 1.59)               | 1.45 (1.15, 1.74)              | 1.29 (1.03, 1.56) | 1.23 (0.87, 1.59)               |
| Switzerland     | 1.47 (1.12, 1.82)              | 0.95 (0.69, 1.21) | 1.20 (0.77, 1.63)               | 1.49 (1.12, 1.87)              | 0.95 (0.68, 1.21) | 1.21 (0.76, 1.66)               | 1.50 (1.12, 1.87)              | 0.95 (0.68, 1.21) | 1.21 (0.76, 1.66)               |
| US              | 1.52 (1.41, 1.63)              | 1.48 (1.37, 1.58) | 1.45 (1.29, 1.60)               | 1.53 (1.42, 1.64)              | 1.48 (1.37, 1.59) | 1.45 (1.29, 1.61)               | 1.56 (1.44, 1.68)              | 1.51 (1.40, 1.63) | 1.48 (1.31, 1.65)               |
| <b>Overall</b>  | 1.37 (1.31, 1.43)              | 1.29 (1.25, 1.32) | 1.23 (1.15, 1.31)               | 1.39 (1.32, 1.45)              | 1.30 (1.26, 1.33) | 1.24 (1.16, 1.32)               | 1.41 (1.34, 1.48)              | 1.32 (1.28, 1.35) | 1.25 (1.17, 1.34)               |

\*Standardized to the mean gender and age distribution across surveys

\*\*Standardized to the mean gender, age, and educational level across surveys

## References

1. Fisher GG, Ryan LH. Overview of the Health and Retirement Study and Introduction to the Special Issue. *Work Aging Retire* 2018; **4**(1): 1-9.
2. Smith JP. Wealth inequality among older Americans. *J Gerontol B Psychol Sci Soc Sci* 1997; **52 Spec No**: 74-81.
3. Gustman A, Steinmeier T. How changes in social security affect recent retirement trends. *Res Aging* 2009; **31**(2): 261-90.
4. Gustman AL, Steinmeier TL. Retirement outcomes in the Health and Retirement Study. *Soc Secur Bull* 2000; **63**(4): 57-71.
5. Rohwedder S, Willis RJ. Mental Retirement. *J Econ Perspect* 2010; **24**(1): 119-38.
6. Payne CF, Gomez-Olive FX, Kahn K, Berkman L. Physical Function in an Aging Population in Rural South Africa: Findings From HAALSI and Cross-National Comparisons With HRS Sister Studies. *J Gerontol B Psychol Sci Soc Sci* 2017; **72**(4): 665-79.
7. Berkman LF, Zheng Y, Glymour MM, Avendano M, Borsch-Supan A, Sabbath EL. Mothering alone: cross-national comparisons of later-life disability and health among women who were single mothers. *J Epidemiol Community Health* 2015; **69**(9): 865-72.
8. F. Malter and A. Börsch-Supan (Eds.). SHARE Wave 5: Innovations & Methodology. Munich: MEA, Max Planck Institute for Social Law and Social Policy, 2015.
9. Zhao Y, Hu Y, Smith JP, Strauss J, Yang G. Cohort profile: the China Health and Retirement Longitudinal Study (CHARLS). *International Journal of Epidemiology* 2014; **43**(1): 61-8.
10. Bravo D, Heeringa SG, Quijada S, Vásquez J. Encuesta de Previsión Social, 2009-2009. Documento Metodológico. Santiago: Universidad de Chile.
11. Taylor R, Conway L, Calderwood L, et al. Health, wealth and lifestyles of the older population in England: The 2002 English Longitudinal Study of Ageing. Technical Report. London: National Centre for Social Research, 2007.
12. Ichimura H, Hashimoto H, Shimizutani S. Japanese Study of Aging and Retirement. JSTAR First Results. Tokyo: The Research Institute of Economy, Trade, and Industry, 2009.
13. Korea Employment Information Service. KLoSA (Korean Longitudinal Study of Aging). 2015. <https://survey.keis.or.kr/eng/klosa/klosa01.jsp>.
14. Kyung Lee H, Hee Lee S. Depression, Diabetes, and Healthcare Utilization: Results from the Korean Longitudinal Study of Aging (KLoSA). *Iran J Public Health* 2014; **43**(1): 6-15.
15. Bergmann M, Kneip T, De Luca G, Scherpenzeel A. Survey participation in the Survey of Health, Ageing and Retirement in Europe (SHARE), Wave 1-7. Munich, Germany: SHARE-ERIC, 2019.
